RESEARCH ARTICLE

# The redefinition of *Helicobacter pylori* lipopolysaccharide O-antigen and core-oligosaccharide domains

Hong Li<sup>1,2</sup>✉, Tiandi Yang<sup>3</sup>✉, Tingting Liao<sup>2</sup>✉, Aleksandra W. Debowski<sup>2,4</sup>, Hans-Olof Nilsson<sup>2</sup>, Alma Fulurija<sup>2</sup>, Stuart M. Haslam<sup>3</sup>, Barbara Mulloy<sup>3</sup>, Anne Dell<sup>3\*</sup>, Keith A. Stubbs<sup>4</sup>, Barry J. Marshall<sup>2</sup>, Mohammed Benghezal<sup>2,5\*</sup>

**1** West China Marshall Research Center for Infectious Diseases, Center of Infectious Diseases, Division of Infectious Diseases, State Key Laboratory of Biotherapy, West China Hospital, Sichuan University, Chengdu, China, **2** *Helicobacter pylori* Research Laboratory and Ondek Pty Ltd., School of Pathology & Laboratory Medicine, Marshall Centre for Infectious Disease Research and Training, University of Western Australia, Nedlands, Australia, **3** Department of Life Sciences, Imperial College London, South Kensington Campus, London, United Kingdom, **4** School of Chemistry and Biochemistry, University of Western Australia, Crawley, Australia, **5** Swiss Vitamin Institute, Route de la Corniche 1, Epalinges, Switzerland

✉ These authors contributed equally to this work.

✉ Current address: The Howard Hughes Medical Institute, Department of Molecular Physiology and Biophysics, The Roy J. and Lucille A. Carver College of Medicine, University of Iowa, Iowa City, IA, United States of America

\* [a.dell@imperial.ac.uk](mailto:a.dell@imperial.ac.uk) (AD); [mbenghezal@swissvitamin.ch](mailto:mbenghezal@swissvitamin.ch) (MB)

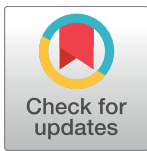

OPEN ACCESS

**Citation:** Li H, Yang T, Liao T, Debowski AW, Nilsson H-O, Fulurija A, et al. (2017) The redefinition of *Helicobacter pylori* lipopolysaccharide O-antigen and core-oligosaccharide domains. PLoS Pathog 13(3): e1006280. <https://doi.org/10.1371/journal.ppat.1006280>

**Editor:** Karla J. F. Satchell, Northwestern University, Feinberg School of Medicine, UNITED STATES

**Received:** January 26, 2017

**Accepted:** March 8, 2017

**Published:** March 17, 2017

**Copyright:** © 2017 Li et al. This is an open access article distributed under the terms of the [Creative Commons Attribution License](https://creativecommons.org/licenses/by/4.0/), which permits unrestricted use, distribution, and reproduction in any medium, provided the original author and source are credited.

**Data Availability Statement:** All relevant data are within the paper and its Supporting Information files.

**Funding:** This work was supported by a Biotechnology and Biological Sciences Research Council grant (BB/K016164/1, Core Support for Collaborative Research to AD and SMH), and by a Wellcome Trust Senior Investigator Award to AD. This work was supported by an Early Career

## Abstract

*Helicobacter pylori* lipopolysaccharide promotes chronic gastric colonisation through O-antigen host mimicry and resistance to mucosal antimicrobial peptides mediated primarily by modifications of the lipid A. The structural organisation of the core and O-antigen domains of *H. pylori* lipopolysaccharide remains unclear, as the O-antigen attachment site has still to be identified experimentally. Here, structural investigations of lipopolysaccharides purified from two wild-type strains and the O-antigen ligase mutant revealed that the *H. pylori* core-oligosaccharide domain is a short conserved hexasaccharide (Glc-Gal-DD-Hep-LD-Hep-LD-Hep-KDO) decorated with the O-antigen domain encompassing a conserved trisaccharide (-DD-Hep-Fuc-GlcNAc-) and variable glucan, heptan and Lewis antigens. Furthermore, the putative heptosyltransferase HP1284 was found to be required for the transfer of the third heptose residue to the core-oligosaccharide. Interestingly, mutation of HP1284 did not affect the ligation of the O-antigen and resulted in the attachment of the O-antigen onto an incomplete core-oligosaccharide missing the third heptose and the adjoining Glc-Gal residues. Mutants deficient in either HP1284 or O-antigen ligase displayed a moderate increase in susceptibility to polymyxin B but were unable to colonise the mouse gastric mucosa. Finally, mapping mutagenesis and colonisation data of previous studies onto the redefined organisation of *H. pylori* lipopolysaccharide revealed that only the conserved motifs were essential for colonisation. In conclusion, *H. pylori* lipopolysaccharide is missing the canonical inner and outer core organisation. Instead it displays a short core and a longer O-antigen encompassing residues previously assigned as the outer core domain. The redefinition of *H. pylori* lipopolysaccharide domains warrants future studies to dissect the role of each domain in

Research Fellowship from the National Health and Medical Research Council (NHMRC) (APP1073250), ECR Fellowship Support Grant from the University of Western Australia, and an Ada Bartholomew Medical Research Trust Grant to AWD. An ARC Future Fellowship (FT100100291) supported KAS. A grant from West China Hospital, Sichuan University to HL entitled “1.3.5 project for disciplines of excellence, West China Hospital, Sichuan University” (ZY2016201). The funders had no role in study design, data collection and analysis, decision to publish, or preparation of the manuscript.

**Competing interests:** HON and MB are former employees of Ondek Pty Ltd. AF is a current employee of Ondek Pty Ltd. The remaining authors disclose no conflicts.

host-pathogen interactions. Also enzymes involved in the assembly of the conserved core structure, such as HP1284, could be attractive targets for the design of new therapeutic agents for managing persistent *H. pylori* infection causing peptic ulcers and gastric cancer.

## Author summary

The bacterial pathogen *Helicobacter pylori* chronically infects the human stomach and causes ulcers and gastric cancer. The *H. pylori* lipopolysaccharide harbors unique properties that promote persistent infection through immune evasion. Despite the key role of *H. pylori* lipopolysaccharide in the bacterium's pathogenesis, its precise domain organisation is still not available. Here, using a multidisciplinary approach involving biochemistry, genetics and analytical chemistry, we elucidated the *H. pylori* lipopolysaccharide structure and domain organisation. We found that the core domain is a short conserved hexasaccharide missing the canonical inner and outer core organisation. The O-antigen encompasses motifs previously assigned as the outer core domain, starting with a conserved trisaccharide, the variable glucan and heptan moieties and finishing, usually, with Lewis antigens. Furthermore, we demonstrate that the integrity of the core domain and the conserved trisaccharide of the O-antigen are critical for *H. pylori* to colonise the gastric niche. Together, the redefinition of the *H. pylori* lipopolysaccharide domains warrants future studies to dissect their roles in host-pathogen interactions and persistence. Also enzymes involved in the assembly of the conserved structure could be attractive targets for the design of new therapeutic agents for managing persistent *H. pylori* infection.

## Introduction

*Helicobacter pylori* is well-adapted to survival in the human stomach mucosa and establishes persistent infection, which causes chronic gastritis and can lead to peptic ulcer disease and gastric adenocarcinoma [1,2]. Lipopolysaccharide (LPS), a highly acylated glycolipid compactly anchored in the outer leaflet of the outer membrane (OM), is a key factor for *H. pylori* to establish colonisation and persistence in the gastric niche [3–7].

As a constituent biomolecule of most Gram-negative bacteria, the LPS is typically composed of three domains: the hydrophobic lipid A (or endotoxin), which anchors the molecule in the OM; the variable O-antigen extending from the cell to the external environment; and the core-oligosaccharide (which can be further divided into the inner and outer core), which links the O-antigen to the lipid A [8]. *H. pylori* constitutively modifies the *de novo* synthesized bi-phosphorylated and hexa-acylated KDO<sub>2</sub>-lipid A into a mono-phosphorylated and tetra-acylated KDO-lipid A to evade host immune surveillance and establish a persistent colonisation [9]. This unique lipid A structure confers *H. pylori* with the ability to resist cationic antimicrobial peptides (CAMPs), and to evade Toll-like receptor 4 (TLR-4) recognition [9]. In addition, the O-antigen of *H. pylori* LPS contains fucosylated oligosaccharides that mimic human Lewis antigens [5,10–12]. *H. pylori* is known to extensively vary its Lewis antigen expression pattern *in vivo*, which also contributes to its ability to evade host immune detection and adapt to the host environment during persistent infection [5].

Our group has recently summarised the studied LPS structure and biosynthesis in *H. pylori* [13]. Being the first *H. pylori* strain with complete genome sequencing [14], the LPS structure of *H. pylori* strain 26695 is the most-studied and best-characterized [15–17]. The lipid A and

Lewis antigens of *H. pylori* LPS have been well-characterised in terms of biosynthesis, structure and function [13]. However additional work is needed in regard to the characterization of the core-oligosaccharide domain. Similar to other Gram-negative bacteria [8], the core-oligosaccharide domain of 26695 is conceptually divided into two parts, the inner core and outer core [13]. The inner core is built as a conserved hexasaccharide (Glc-Gal-DD-Hep-LD-Hep-LD-Hep-KDO) and the first two LD-Hep residues (designated as Hep I and Hep II) are added sequentially by heptosyltransferases HP0279 and HP1191 [18]. However, the enzyme responsible for the transfer of the third DD-Hep residue (designated as Hep III) to Hep II remains to be identified. The outer core structure of *H. pylori* 26695 LPS was initially postulated to contain a DD-heptan with the first DD-Hep residue connecting a side-branched  $\alpha$ -1,6-glucan [6,16,17,19–22], but a recent reinvestigation into the structure of 26695 LPS revised the outer core as being a linear arrangement of DD-heptan and  $\alpha$ -1,6-glucan linked to the inner core through a trisaccharide (GlcNAc-Fuc-DD-Hep) termed as Trio [15] (Fig 1A). Furthermore, the attachment site of the O-antigen to the core-oligosaccharide has not been identified [13,15], and therefore the precise assignment of the O-antigen and core-oligosaccharide domains remains unclear.

Continuing the structural investigations of *H. pylori* LPS performed by the research groups of Trent [9,18,23–28], Moran [29–31], Altman [15,19,22,32–35] and Feldman [36,37], the goal of this study was to precisely define the core-oligosaccharide and O-antigen domains. The LPS

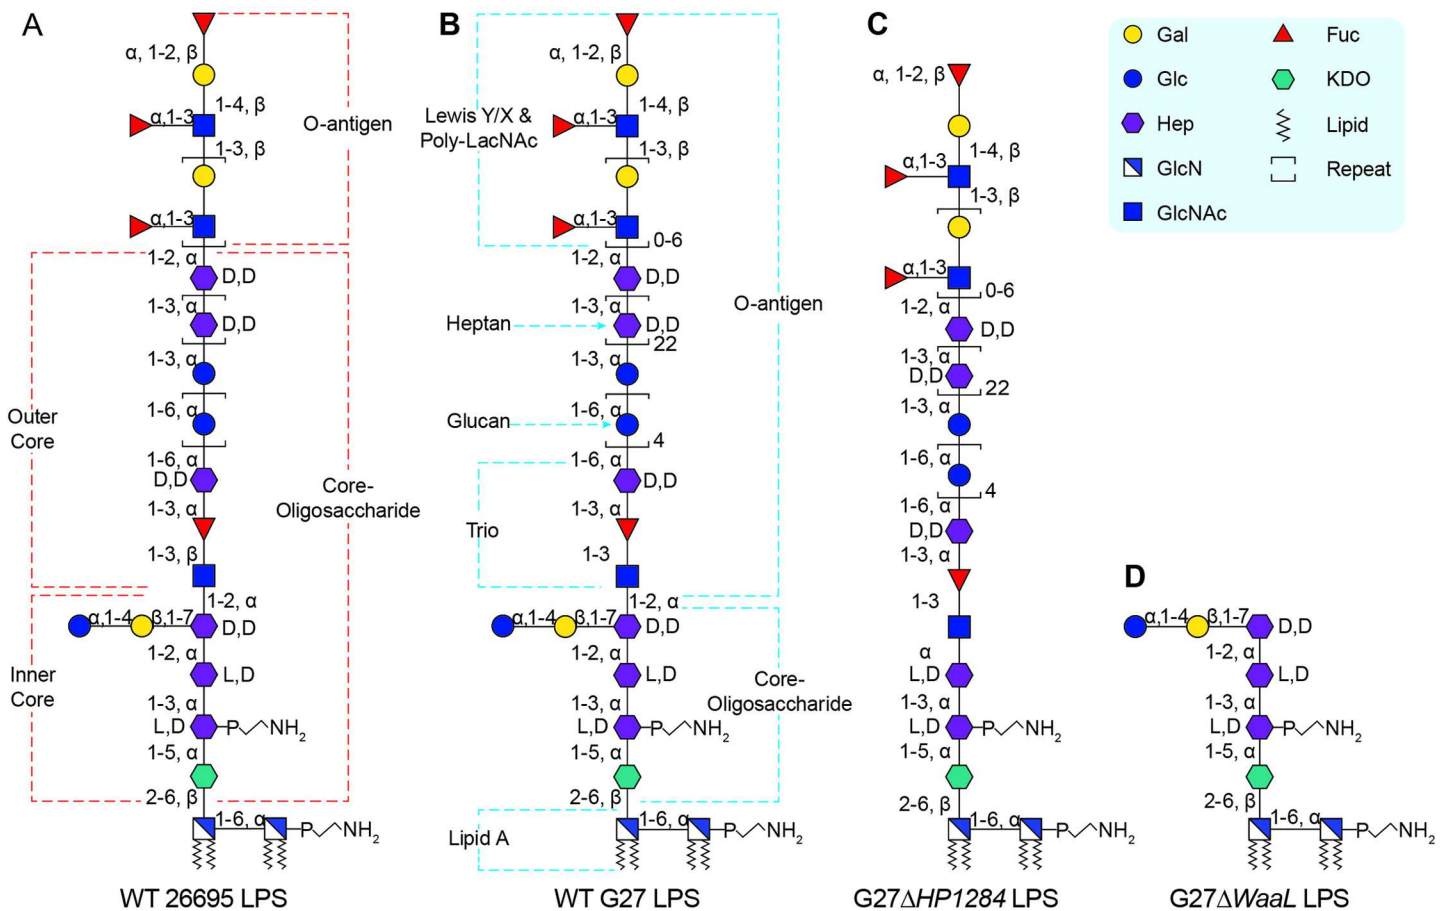

**Fig 1. Previously proposed and the redefined LPS structure in *H. pylori*.** The previously proposed LPS structure in strain 26695 wild-type (A), the redefined LPS structures of the G27 wild-type (B), G27 $\Delta$ HP1284 (C) and G27 $\Delta$ waaL (D). The nomination of different domains of the LPS is annotated.

<https://doi.org/10.1371/journal.ppat.1006280.g001>

of the *H. pylori* strain G27 was chosen to be analysed in this study, as this fully sequenced strain has been used extensively in *H. pylori* research [38], and for which the LPS structure has not been characterised. Using a combination of mass spectrometry and NMR spectroscopy, we redefined the core-oligosaccharide domain of *H. pylori* LPS to comprise solely the inner core conserved hexasaccharide of the previous model (Glc-Gal-DD-Hep-LD-Hep-LD-Hep-KDO, see annotations on [Fig 1B](#) and [Fig 1D](#)). Therefore, we propose that the *H. pylori* O-antigen domain includes the outer core structure of the previous model.

We further demonstrate that deletion of a conserved putative heptosyltransferase HP1284 from both G27 and X47 strains resulted in the attachment of O-antigen onto an incomplete core-oligosaccharide missing Hep III and the adjoining Glc-Gal unit ([Fig 1C](#)), suggesting that HP1284 is likely to be the Hep III transferase of the core-oligosaccharide domain. In addition, mutations of *HP1284* and *waaL* led to increased sensitivity to polymyxin B and loss of colonisation in the mouse model compared to wild-type. Mapping the mutagenesis and colonisation data of previous studies onto the newly defined *H. pylori* LPS core-oligosaccharide and O-antigen domains suggests that the conserved Trio and the intact core domains are critical for colonisation.

## Results

### The core-oligosaccharide and O-antigen domains of *H. pylori* G27 LPS are similar to that of strain 26695

Using preparative isolation, highly pure LPS from wild-type G27 was obtained for MS structural analysis. GC-EI-MS analysis of monosaccharides as their TMS (trimethylsilyl) derivatives ([Fig A in S1 Text](#)) revealed that wild-type G27 LPS contains Fuc, Gal, Glc, Hep, GlcNAc and KDO. Methylation linkage analysis ([Table A in S1 Text](#)) indicated a complex monosaccharide composition including terminal and 3-linked Fuc; terminal, 2-, 3- and 4-linked Gal; terminal, 3-, and 6-linked Glc; 2- and 3-linked DD-Hep; 2-, 3-, 7- and 2,7-linked Hep; and terminal, 3-, 4- and 3,4-linked GlcNAc. Overall the monosaccharide composition of wild-type G27 LPS is very similar to the recently re-investigated LPS from strain 26695 [15]. Terminal and 2-linked Gal, and 3,4-linked GlcNAc that are characteristics of the LacNAc element of Lewis antigens were found, together with terminal Fuc, suggesting the existence of both Le<sup>x</sup> and Le<sup>y</sup> epitopes that are observed in the LPS of *H. pylori* strains including 26695 [6,7,15–17], SS1 [6,16,32], J99 [6], NCTC11637 [16].

The wild-type G27 LPS was subjected to methanolysis to facilitate further MS analysis as intact LPS molecules are normally too large for direct MS characterisation. Matrix-assisted laser desorption/ionization time of flight (MALDI-TOF) mass fingerprints of the methanolysis products of the wild-type G27 LPS sample after permethylation are shown in [Fig 2A](#). The annotation of MS peaks was based on the previously characterised strain 26695 LPS and monosaccharide composition provided by the GC-EI-MS analyses. An MS peak at mass-to-charge ratio ( $m/z$ ) 518.2 shown in [Fig 2A](#) was annotated as LacNAc, and a peak at  $m/z$  568.4 was annotated as *N*-acylated-glucosamine from lipid A. A cluster of MS peaks at  $m/z$  695.3, 899.4, 1103.5, 1307.5 and 1511.6 shown in [Fig 2A](#) was assigned to glucan-Hep-Fuc structures with Glc repeating from one to five times respectively. A peak at  $m/z$  2598.2 in [Fig 2A](#) corresponds to a phosphorylated Glc-Gal-tri-Hep-KDO-lipid A structure whose methanolysed products give rise to most other peaks in the spectrum. The Trio is cleaved into two parts: the GlcNAc remains attached to the phosphorylated Glc-Gal-tri-Hep-KDO structure, giving rise to peaks at  $m/z$  2843.3 and 2336.0 in [Fig 2A](#), and the -DD-Hep-Fuc portion is attached to the previously mentioned glucan clusters. Since all the components of the wild-type G27 LPS are also found in the LPS of strain 26695, we propose that both LPS molecules are structurally very similar (compare [Fig 1A](#) and [Fig 1B](#)).

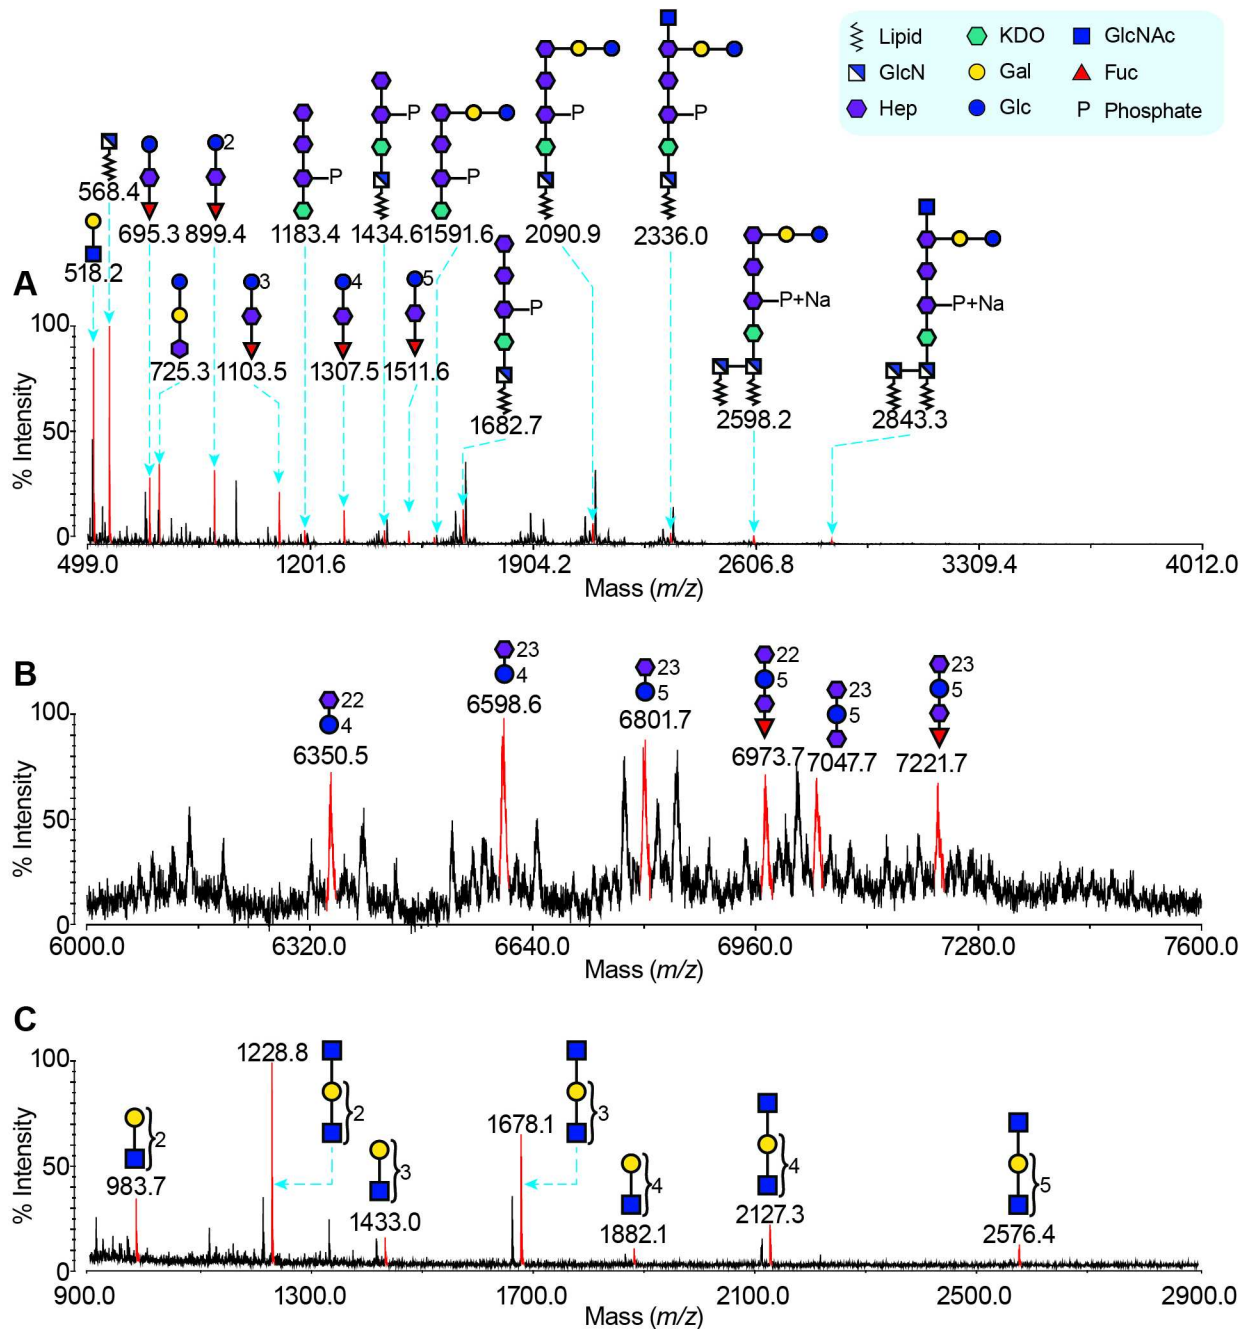

**Fig 2. MS analysis of *H. pylori* Wild-type G27 LPS.** Wild-type G27 LPS samples were subjected to (A): methanolysis; (B): mild HF hydrolysis, and (C): mild periodate oxidation, respectively. MALDI-TOF MS spectra were recorded after permethylation. The MS peaks corresponding to sodiated glycans are coloured red, and annotated with  $m/z$  values and glycan structures. Note that for the spectrum after mild HF hydrolysis, the most intense isotopic peaks are annotated. Other blank signals are mainly due to (A): an addition of a sodium atom; and (C): incomplete reduction. The MS data indicate the fundamental architecture of wild-type G27 LPS is the same as strain 26695, containing LacNAc, heptan, glukan, Trio, the phosphorylated Glc-Gal-tri-Hep-KDO structure and lipid A.

<https://doi.org/10.1371/journal.ppat.1006280.g002>

To characterise the heptan in the wild-type G27 LPS, mild HF hydrolysis was used to cleave the 1,3-linked Fuc-GlcNAc glycosidic bond in the Trio moiety so that the entire heptan-glukan structure could be observed. The MALDI-TOF spectrum of wild-type G27 LPS after mild HF

hydrolysis and permethylation gives an MS pattern of glycan fragments strongly suggesting that the heptan and glucan can be as long as 23 Hep and 5 Glc units respectively (Fig 2B). This full-length heptan-glucan structure gives rise to a peak at  $m/z$  7721.7.

To further determine the length of the poly-LacNAc portion, wild-type LPS was mildly oxidised using sodium periodate and the MALDI-TOF spectrum was recorded (Fig 2C). Periodate oxidation cleaves glycans between neighbouring hydroxyl groups, therefore poly-LacNAc/Lewis structures survive the reaction while most other glycan structures are completely oxidised. Notably, for the Le<sup>y</sup> epitope, two terminal Fuc residues were oxidised, leaving intact LacNAc structures; whereas for the Le<sup>x</sup> epitope, terminal Gal and Fuc were oxidised, leaving GlcNAc-LacNAc structures. As expected, two clusters of peaks at  $m/z$  1228.8, 1678.1, 2127.3 and 2576.4, and at  $m/z$  983.7, 1433.0 and 1882.1 that are representative of the Le<sup>x</sup> and Le<sup>y</sup> epitopes respectively can be observed in the MS spectrum (Fig 2C). The longest observed poly-LacNAc has 6 repeating units.

Collectively, our data suggest that the fundamental architecture of G27 wild-type LPS is very similar to strain 26695. They both contain fucosylated LacNAc (Le<sup>x</sup> and Le<sup>y</sup>) (Fig B in S1 Text), heptan, glucan, Trio, a phosphorylated Glc-Gal-tri-Hep-KDO structure and lipid A.

### *H. pylori* G27 HP1284 encodes putative Hep III transferase of the core LPS

Not all glycosyltransferases responsible for *H. pylori* LPS assembly have been identified [13]. Of particular interest is the heptosyltransferase responsible for the transfer of Hep III to which the conserved Trio motif is attached (Fig 1A). A targeted approach to identify the Hep III transferase of the core LPS was based on the identification of highly conserved putative glycosyltransferases in the *H. pylori* genome [13]. The putative protein sequence of HP1284 in strain G27 was found to share 36% identity to LPS Hep III transferase WaaQ from *Haemophilus influenzae* 86-028NP. Therefore, the corresponding mutant G27ΔHP1284 was constructed. Silver staining of LPS extracted from G27ΔHP1284 displayed a similar pattern to the wild-type LPS, although it appeared to be missing bands sized around 15–20 kDa LPS (Fig 3A, lane 2), indicating that HP1284 is involved in the biosynthesis of LPS. Genetic complementation of G27ΔHP1284 mutant restored the wild-type LPS profile (Fig 3A, lane 3). To gain higher resolution of the core region, Tricine-SDS-PAGE was used to separate the low molecular weight LPS species more effectively. This revealed that mutation of HP1284 in G27 resulted in a clear change in bands of low molecular weight LPS (about 10 kDa) corresponding to core lipid-A (Fig 3B, lane 2). The same profile was also observed for HP1284 isogenic mutants made in strains 26695 and X47 (Fig 3B, lanes 6 and 8) demonstrating that this gene's role in the biosynthesis of the *H. pylori* LPS core region is conserved across different strains. Upon genetic complementation of G27ΔHP1284 mutant, the 10 kDa band species on Tricine-SDS-PAGE were restored (Fig 3B, lane 3).

To gain further insight into the role of HP1284 gene in the *H. pylori* LPS biosynthesis, the same MS-based strategies were used for analysing the structure of LPS purified from G27ΔHP1284. The MS spectra of the mild HF hydrolysed and sodium periodate oxidised LPS from G27ΔHP1284 were very similar to the wild-type strain (Fig C in S1 Text), indicating the existence of poly-LacNAc, heptan, glucan and the Trio moiety. However, the MS spectrum of permethylated G27ΔHP1284 LPS after methanolysis presented a distinct MS pattern (Fig 4A). The MS peak at  $m/z$  1183.4 in Fig 2A corresponding to the phosphorylated GlcNAc-tri-Hep-KDO structure shifted to a peak at  $m/z$  1180.6 in Fig 4A. Analysis using MALDI-TOF/TOF of this peak suggested that it corresponded to a phosphorylated glycan with a sequence of GlcNAc-Hep-Hep-KDO (Fig C in S1 Text), which indicated that the Hep III residue of the

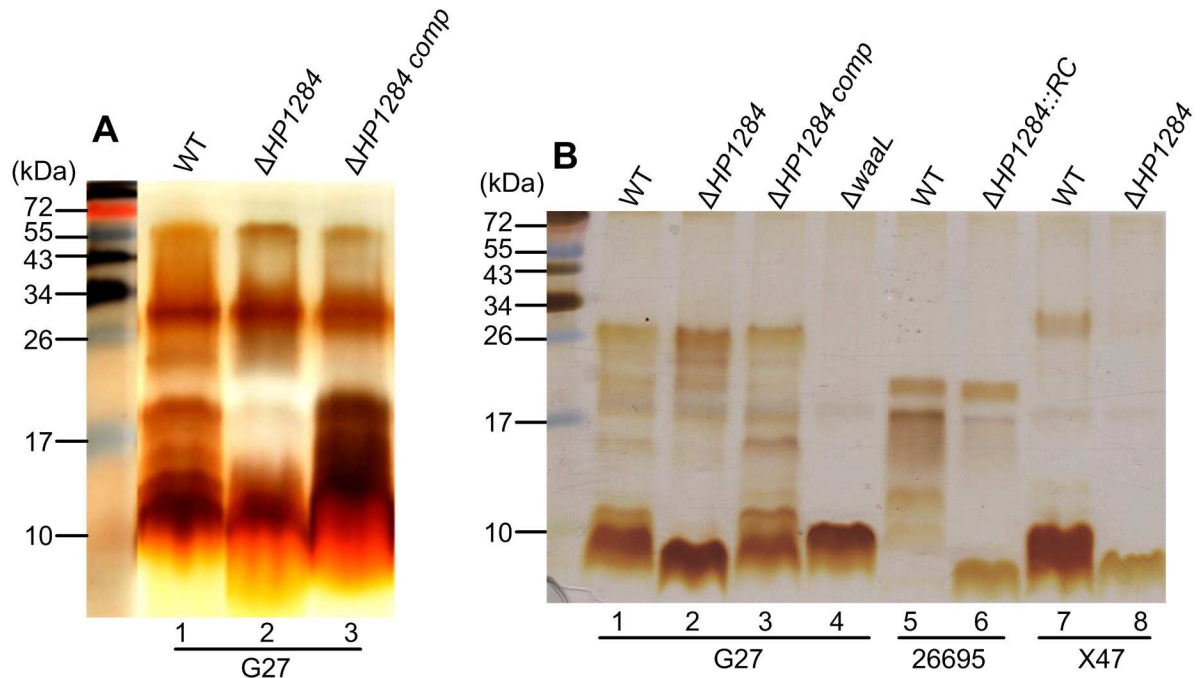

**Fig 3. Effects of *HP1284* and *waaL* mutation on *H. pylori* LPS.** LPS samples from *H. pylori* wild-type and mutants were analysed by SDS-PAGE and silver stain. (A): Low resolution SDS-PAGE. Lane 1–3: G27 wild-type, *HP1284* deletion and *HP1284* complementation in strain G27; (B): High resolution Tricine-SDS-PAGE. Lane 1–4: wild-type, *HP1284* deletion, *HP1284* complementation and *waaL* deletion in strain G27; Lane 5–6: wild-type and *HP1284* insertion mutant in strain 26695; Lane 7–8: wild-type and *HP1284* deletion mutant in strain X47.

<https://doi.org/10.1371/journal.ppat.1006280.g003>

core together with the Glc-Gal disaccharide attached to it were missing. Methylation linkage analysis also provided supportive data, *i.e.*, no terminal-Glc, 4-linked Gal or 2,7-linked Hep was found (Table A in S1 Text).

Together, the sequence homology of *HP1284* to the LPS Hep III transferase *WaaQ* of *H. influenza* and the genetic and structural data presented above indicate that the conserved putative heptosyltransferase *HP1284* is very likely to be the Hep III transferase, participating in the biosynthesis of the core-oligosaccharide of *H. pylori* LPS.

### *H. pylori* LPS core-oligosaccharide domain is short and missing the canonical outer and inner core organisation

The *HP1284* mutation in the core-oligosaccharide did not affect further LPS synthesis and the function of O-antigen ligase *WaaL*, though it did lead to a simultaneous loss of the Hep III residue of the core and the Glc-Gal disaccharide. To precisely identify the O-antigen attachment site, and to define the core and O-antigen domains of *H. pylori* LPS, we analysed the LPS structure of the *waaL* mutant that lacks the O-antigen and only harbours core-lipid A [36]. Therefore, core-lipid A was purified from the *waaL* deletion mutant G27Δ*waaL* (Fig 3B, lane 4) to carry out methanolysis/MS analysis. No peak corresponding to the LacNAc, heptan, glucan and Trio was observed, suggesting that the core-oligosaccharide in *H. pylori* G27Δ*waaL* lacks all the glycan structures from the Trio outwards (Fig 4B).

An MS peak at *m/z* 1591.7 corresponding to a short core-oligosaccharide with a sequence of Glc-Gal-tri-Hep-KDO was observed (Fig 4B). MS peaks at *m/z* 1886.9 and 2598.4 that are indicative of core-lipid A structures were also observed (Fig 4B). GC-EI-MS linkage analysis

revealed a much simpler monosaccharide composition including terminal-Glc, 4-linked Gal, 2-, 3- and 7-linked Hep (Table A in S1 Text).

To further confirm the structure of G27Δ*waaL* LPS, NMR experiments on intact LPS were carried out for LPS samples in D<sub>2</sub>O containing deuterated dodecylphosphocholine (D<sub>38</sub>-DPC), thus anchoring the lipid tails into micelles. This technique has been used previously for the study of glycolipids [39] and rough-type LPS [40]. Tentative assignments of some resonances in the <sup>1</sup>H and <sup>13</sup>C spectra of the G27Δ*waaL* LPS derived from analysis of 2D TOCSY and NOESY spectra are listed in Table B in S1 Text. Seven anomeric proton signals attributable to three α-Hep, one α-GlcN, one α-Glc, one β-GlcN and β-Gal were observed, which is fully consistent with our MS data and previous research [32]. In accord with our MS experiments, the NMR data suggest that the G27Δ*waaL* LPS is truncated from the Trio, indicating that *H. pylori* G27 synthesises a very short core-oligosaccharide with a sequence of αGlc1-4βGal1-7αHep1-2αHep1-3αHep-KDO.

Deletion of the *waaL* gene in *H. pylori* strain X47 also resulted in a short core LPS (Fig D in S1 Text). In addition, double mutation of *HP1284* and *waaL* led to further reduction in the size of the core-oligosaccharide, supporting that *HP1284* encodes for the putative heptosyl-transferase that is responsible for transfer of the Hep III residue (Fig D in S1 Text). The LPS molecules purified from X47 wild-type and X47Δ*HP1284* were subjected to methanolysis and

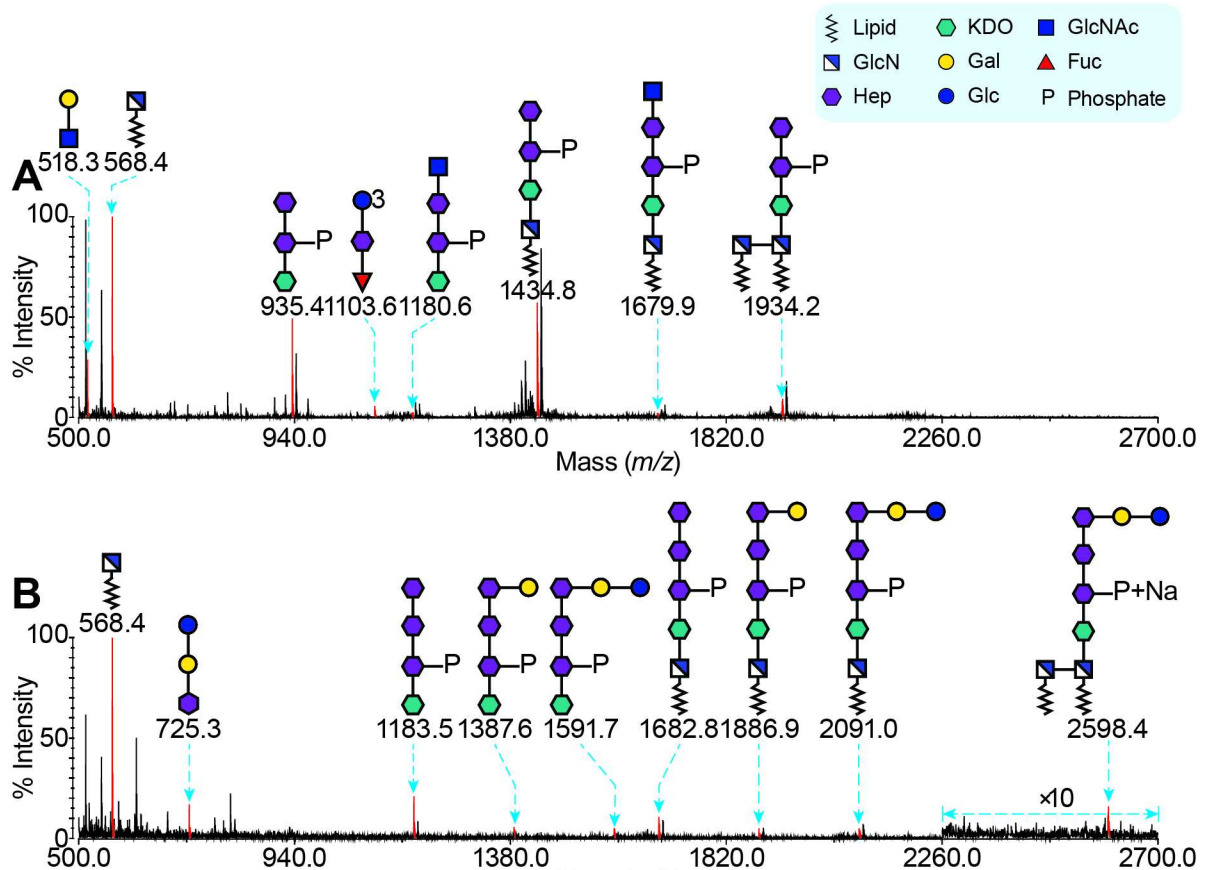

**Fig 4. MS Analysis of LPS from G27 *HP1284* and *waaL* Deletion Mutants.** The LPS samples were methanolysed, permethylated and analysed by MS. MALDI-TOF spectra of LPS from G27 *HP1284* and *waaL* deletion mutants are shown in (A) and (B), respectively. The MS peaks corresponding to sodiated heptan-glucon structures are coloured red and annotated with *m/z* values. Most blank peaks are due to contamination and the addition of a sodium atom. The MS data indicate the core-oligosaccharide of G27 LPS is a hexasaccharide with a sequence of Glc-Gal-Hep-Hep-Hep-KDO. The deletion of *HP1284* leads to an incompletely synthesized core, which does not affect its O-antigen.

<https://doi.org/10.1371/journal.ppat.1006280.g004>



analysed by MS. The resulting data indicate that X47 LPS shares the same structural architecture with G27 and 26695 LPS (Fig E in S1 Text). In addition, the deletion of *HP1284* in the X47 background led to the same structural change with the core-oligosaccharide missing the Hep III residue, as seen in *G27ΔHP1284* (Fig E in S1 Text).

Together, these results led to the redefinition of the core and O-antigen domains of *H. pylori* LPS and to the identification of the putative Hep III transferase of the core-oligosaccharide domain (Fig 1B, 1C and 1D).

### Deletion of *HP1284* or *waaL* leads to a moderate increase in polymyxin B susceptibility

Taking into consideration the redefinition of the *H. pylori* LPS core-oligosaccharide and the O-antigen domains in this study, we assessed the roles played by the putative Hep III transferase *HP1284* and the O-antigen ligase *WaaL* in *H. pylori*'s resistance to CAMPs. Polymyxin B has a similar mechanism of action to CAMPs, and therefore is an experimental substitute for CAMPs in laboratory settings [9,18]. Minimal inhibitory concentration (MIC) of polymyxin B was determined for the *HP1284* and *waaL* mutants in three different *H. pylori* strains G27, X47 and 26695, using polymyxin B Etest strips. As the KDO hydrolase (*HP0579/HP0580*) mutation confers strong sensitivity to polymyxin B due to a deficiency in lipid A modification [18], it was introduced in strain G27 and X47 (*G27ΔHP0579* and *X47ΔHP0579-HP0580* mutants respectively) for comparative determination of polymyxin B MICs.

Resistance to polymyxin B varied substantially among three *H. pylori* wild-type strains, with MICs of  $4.8 \pm 1.1$ ,  $332.8 \pm 70.1$  and  $149.3 \pm 37.0$   $\mu\text{g/mL}$  in G27, X47 and 26695, respectively (Table 1). As expected, KDO hydrolase mutants *G27ΔHP0579* and *X47ΔHP0579-HP0580* showed a marked 37.0 and 1147.0 fold decrease in resistance to polymyxin B when compared to their corresponding wild-type strains. The *HP1284* mutant in G27, X47 and 26695 showed a 5.3, 3.1 and 2.5 fold decrease in resistance to polymyxin B, and the *waaL* mutant in G27 and X47 showed a 3.7 and 5.7 fold decrease in resistance to polymyxin B.

Compared to the severe decrease in polymyxin B resistance of the KDO hydrolase mutant, the *HP1284* and *waaL* mutants only exhibited a moderate decrease in resistance to polymyxin B.

### Deletion of *HP1284* and *waaL* leads to loss of colonisation in the mouse model

We investigated the role of *HP1284* in colonisation of the gastric mucosa using strain X47, a robust mouse coloniser [41]. Two independent sets of mouse experiments were performed

**Table 1. Polymyxin B Minimal Inhibitory Concentration (MIC) of *H. pylori* G27, X47 and 26695 Wild-type Strains and LPS Mutants.**

| Strains                  | Role in LPS biosynthesis     | Polymyxin B MIC ( $\mu\text{g/mL}$ ) |
|--------------------------|------------------------------|--------------------------------------|
| G27 wild-type            | Full-length LPS              | $4.8 \pm 1.1$                        |
| <i>G27ΔHP1284</i>        | Putative Hep III transferase | $0.9 \pm 0.1$                        |
| <i>G27ΔwaaL</i>          | O-antigen ligase             | $1.3 \pm 0.3$                        |
| <i>G27ΔHP0579</i>        | KDO hydrolase                | $0.13 \pm 0.0$                       |
| X47 wild-type            | Full-length LPS              | $332.8 \pm 70.1$                     |
| <i>X47ΔHP1284</i>        | Putative Hep III transferase | $106.7 \pm 16.5$                     |
| <i>X47ΔwaaL</i>          | O-antigen ligase             | $58.7 \pm 9.2$                       |
| <i>X47ΔHP0579-HP0580</i> | KDO hydrolase                | $0.23 \pm 0.03$                      |
| 26695 wild-type          | Full-length LPS              | $149.3 \pm 37.0$                     |
| 26695 <i>HP1284::RC</i>  | Putative Hep III transferase | $58.7 \pm 9.2$                       |

MIC are reported as  $\mu\text{g/mL}$  and are the average of three experiments using polymyxin B Etest strips (Biomerieux) on CBA plates.

<https://doi.org/10.1371/journal.ppat.1006280.t001>

using C57BL/6J mice. In both Experiment 1 and 2, two weeks after oral challenge, the X47 wild-type strain could establish colonisation within the mouse stomach, whereas no bacteria could be recovered from the mice challenged with X47ΔHP1284 (Table 2). This suggests that HP1284 is required by *H. pylori* strain X47 for host colonisation.

To assess the mutation of WaaL on colonisation, a third mouse experiment was performed. Again, X47 wild-type strain colonised the mice well by weeks 2 and 8. However, X47ΔwaaL strain was unable to colonise C57BL/6J mice at the two time points (Table 2), suggesting that the O-antigen ligase WaaL is also required for the survival of *H. pylori* strain X47 within a host.

## Discussion

In this study, a combination of genetic and structural analysis of *H. pylori* LPS from wild-type and mutant strains enabled the experimental identification of the O-antigen attachment site and the precise assignment of the core-oligosaccharide and O-antigen domains. In addition, HP1284 is proposed to encode the Hep III transferase of the LPS core domain, based on structural analysis of corresponding mutant LPS in two strains, sequence homology to the Hep III transferase WaaQ of *H. influenza*, and the reduction in the size of the core-oligosaccharide of the double HP1284/waaL mutant compared to the single waaL mutant. Deletion of HP1284 and the O-antigen ligase waaL led to a moderate decrease in resistance to polymyxin B and loss of colonisation in the mouse model.

The structural analysis of core-oligosaccharide accumulating in the O-antigen ligase mutant, G27ΔwaaL, enabled the identification of the Hep III residue as the precise attachment site of the *H. pylori* O-antigen (Fig 5). The core-oligosaccharide in the G27ΔwaaL mutant is a short hexa-saccharide comprised of Glc-Gal-DD-Hep-LD-Hep-LD-Hep-KDO (Fig 1D), indicating that the missing glycan structure, from the Trio outwards, is transferred as the O-antigen by ligase WaaL to the Hep III residue. As O-antigen biosynthesis in *H. pylori* is initiated in the cytoplasm through the action of WecA transferring a GlcNAc onto a undecaprenyl phospholipid (UndPP) carrier [36] (Fig 5), we propose that the first GlcNAc residue in the Trio, not the GlcNAc of the Lewis antigen, is the first sugar of the long *H. pylori* LPS O-antigen encompassing the Trio, the glucan, the heptan and Lewis antigens (Fig 1B). This finding challenges the previous LPS model with an inner core and an outer core decorated with an O-antigen composed of Lewis antigens only [16] (Fig 1A).

**Table 2. Viable Counts of *H. pylori* X47ΔHP1284 and X47ΔwaaL mutants Recovered from Mice at 2 or 8 Weeks post Challenge\*.**

| Inoculum strain              | Log <sub>10</sub> CFU (mean ± SD) |             |
|------------------------------|-----------------------------------|-------------|
|                              | Week 2                            | Week 8      |
| <b>Experiment 1 (n = 5)</b>  |                                   |             |
| X47                          | 6.24 ± 0.22                       |             |
| X47ΔHP1284                   | BDL**                             |             |
| <b>Experiment 2 (n = 10)</b> |                                   |             |
| X47                          | 4.95 ± 0.55                       |             |
| X47ΔHP1284                   | BDL                               |             |
| <b>Experiment 3 (n = 5)</b>  |                                   |             |
| X47                          | 6.31 ± 0.24                       | 5.87 ± 0.69 |
| X47ΔwaaL                     | BDL                               | BDL         |

\* The data presented are the mean log<sub>10</sub> CFU ± SD of n = 5 or 10 mice per group.

\*\*BDL, below detectable limit <1.7 log<sub>10</sub> CFU).

<https://doi.org/10.1371/journal.ppat.1006280.t002>

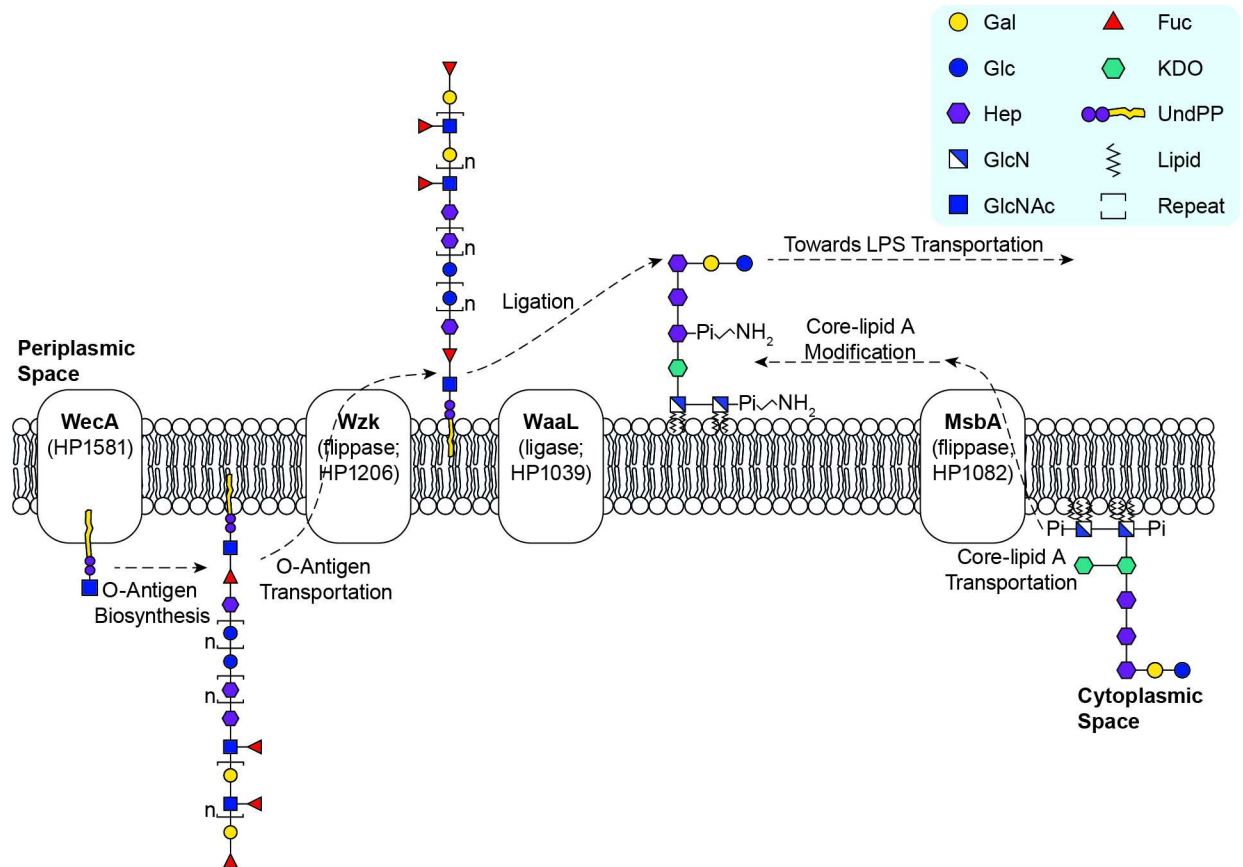

**Fig 5. Proposed Model for the LPS Biosynthetic Pathways in *H. pylori*.** *H. pylori* LPS biosynthesis follows a novel Wzk-dependent pathway [36]. The assembly of the very long O-antigen occurs in the cytoplasm and is initiated by WecA [36] transferring the GlcNAc residue of the Trio onto the UndPP carrier. Successive glycosyltransferases are recruited to complete the synthesis of the whole O-antigen encompassing the conserved Trio and variable glucan, heptan and Lewis antigens. After assembly in the cytoplasm, the UndPP-linked O-antigen is translocated by flippase Wzk to the periplasm [36]. Also assembled in the cytoplasm, the de novo synthesized core-lipid A is flipped by flippase MsbA to the periplasm [28]. After constitutive modifications through dephosphorylation and deacylation [9], the modified core-lipid A is ligated with O-antigen by the ligase WaaL [36], and the Hep III residue is the attachment site.

<https://doi.org/10.1371/journal.ppat.1006280.g005>

The linear architecture of the heptan-glucan-Trio of the G27 LPS structure is consistent with the recently revised structures of LPS in strains 26695 [15], SS1 [32] and serogroup O:3 [34], supporting that the linearity of this region may be a general feature of *H. pylori* strains. This overturns the paradigm of *H. pylori* LPS outer core containing a DD-heptan with the first DD-Hep residue connecting a side-branched glucan in earlier studies [6,16,17,19–22]. Furthermore, our study demonstrated the presence of the Trio in both G27 and X47 LPS structures. This moiety has also been reported in the revised LPS structures of 26695 [15], SS1 [32] and serogroup O:3 [34], suggesting that the Trio is a common LPS feature of *H. pylori* strains. Conservation of the Trio among *H. pylori* strains contrasts with the variability of the distal domains of O-antigen such as glucan, heptan and Lewis antigen in 26695 [15], and a short oligomer of 1,2-linked ribofuranose (riban) and Lewis antigen in SS1 [32].

Of note, the O-antigen in *HP1284* deletion mutant is transferred onto an incomplete core-oligosaccharide missing the Hep III and attached disaccharide (Fig 1C). This suggests that when the Hep III residue is missing, *H. pylori* WaaL can still use the Hep II residue as the attachment site for the O-antigen ligation, and that the branched disaccharide in the core-

oligosaccharide is not relevant for the activity of *H. pylori* WaaL. This differs from *Escherichia coli* and *Salmonella enterica* in which the terminal GlcNAc residue in the core-oligosaccharide acceptor is crucial for recognition by WaaL [42,43]. However, it has been shown that a *waaL* mutant of *E. coli* cannot be cross-complemented by the *waaL* gene of *H. pylori* [36], supporting that WaaL in different bacteria has high specificity for its cognate core-oligosaccharide [37,44].

Prior to this study, glycosyltransferases responsible for transferring the Hep III, the GlcNAc and Fuc residues of the Trio, and the heptan were unknown [13]. Here the targeted discovery of the highly conserved putative heptosyltransferase gene *HP1284* combined with our genetic and structural data support that HP1284 is the Hep III transferase (Fig 1C). As discussed earlier, WecA can now be considered the enzyme transferring the GlcNAc residue of the Trio, whereas the fucosyltransferase of Trio is yet to be identified. Combined with the previously characterised LPS biosynthetic genes, currently known glycosyltransferases were assigned to the complete structure of *H. pylori* G27 LPS (Fig 6).

To assess the role of the core-oligosaccharide and O-antigen domains in CAMPs resistance, polymyxin B MICs were measured in corresponding mutants and compared to the KDO hydrolase mutant. This mutant is highly sensitive to CAMPs due to deficiency in the constitutive modifications of lipid A [18], the primary mechanism involved in *H. pylori*'s resistance to CAMPs [9]. In this study, the KDO hydrolase mutants displayed a 37- and 1147-fold higher susceptibility, in G27 and X47 respectively, confirming the key role of lipid A modification in resistance to CAMPs in *H. pylori*. In contrast, the lack of O-antigen in the *waaL* mutant or the absence of core Hep III and adjoining Glc-Gal disaccharide in the *HP1284* mutant only led to a 3- to 5-fold increase in susceptibility to polymyxin B, suggesting that *HP1284* or *waaL* mutations is unlikely to affect the highly-ordered lipid A modification process. Of note, polymyxin B MICs varied almost 70-fold among the three tested wild-type *H. pylori* strains with MICs increasing in the following order, G27, 26695 and X47. This suggests that strain specific mechanisms other than the constitutive lipid A modifications also contribute to resistance to CAMPs. For example, the incorporation of host cholesterol onto the surface of *H. pylori* [45], or the regulation of the glycerophospholipid content in the OM as reported in *S. typhimurium* [46] may also be critical for CAMP resistance.

Finally, mapping LPS mutagenesis and colonisation data of previous studies onto the redefined *H. pylori* LPS structure suggested that the conserved Trio and the short core of *H. pylori* LPS are important for colonisation whereas the less conserved domains are less important (Fig 6). For example, the *HP0826* mutant in SS1 strain, which is devoid of Lewis antigen, is still able to colonise the host, although less efficiently compared to the wild-type [16,35]. The DD-heptan and the glucan of the O-antigen are not essential for colonisation [19,33,47], while the *HP0479* mutant truncated at the Hep residue of the Trio resulted in loss of colonisation ability [22]. The variability of the O-antigen beyond the conserved Trio may enable *H. pylori* to adapt to a specific host for example via host mimicry and the presence of Lewis antigens. In contrast, the conserved core and Trio may reflect evolutionary adaptation to shared mammalian traits such as the innate immune system, enabling the survival and persistence of *H. pylori* within the gastric mucosa.

The requirement of a conserved LPS moiety for gastric colonisation was also observed in this study. The loss of mouse colonisation in the *X47ΔwaaL* mutant could be attributed to the truncation of the conserved Trio moiety rather than the remaining variable regions. However, the inability of the *X47ΔHP1284* mutant to colonise the mouse stomach is intriguing as the LPS structure in this mutant lacks only three carbohydrate units of the core-oligosaccharide yet still harbours the extended O-antigen. In addition, the mutant exhibited only a moderate susceptibility to polymyxin B. This warrants further investigation into the role of the structure of the core-oligosaccharide in host colonisation.

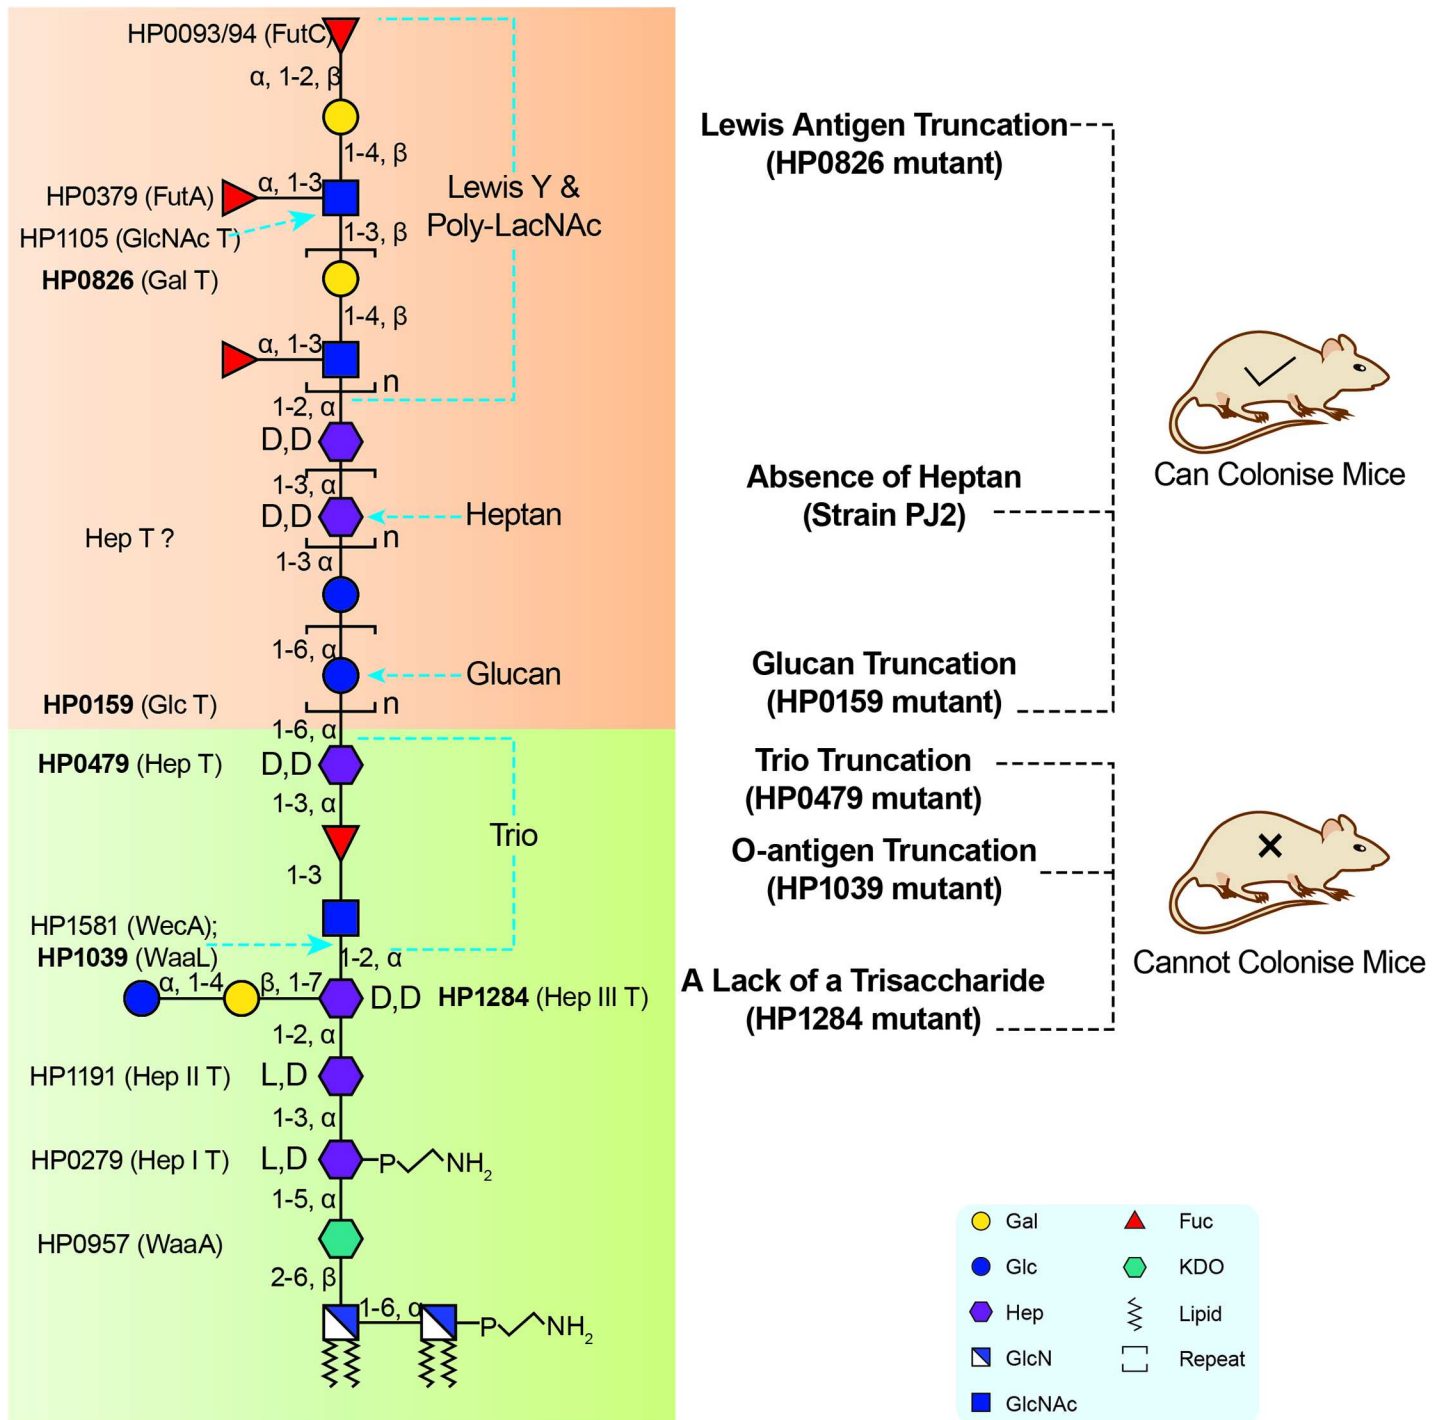

**Fig 6. The conserved Trio and the short core of *H. pylori* LPS are important for colonisation.** Currently known glycosyltransferases are assigned to the redefined complete structure of *H. pylori* LPS. The lipid A, the core-oligosaccharide domain and the Trio are proposed to be conserved and are important for host colonisation, whereas the Lewis antigen, heptan and glucan are variable and non-essential for colonisation.

<https://doi.org/10.1371/journal.ppat.1006280.g006>

In summary, we propose the redefinition of the core-oligosaccharide and O-antigen domains of *H. pylori* LPS. HP1284 is found to be the putative Hep III transferase, and its

mutation leads to an abnormal core-oligosaccharide but does not affect the O-antigen ligation. Future studies are needed to elucidate the essential role of HP1284 in host colonisation.

## Materials and methods

### Bacterial strains and culture conditions

The bacterial strains and plasmids and oligonucleotides used in this study are listed in **Table C** and **D** respectively in **S1 Text**. *H. pylori* strains were cultured on Columbia Blood Agar (CBA) plates, supplemented with 5% horse blood and 5% new-born calf serum (NCS). Antibiotic selection in *H. pylori* was carried out by supplementing media with chloramphenicol (10 µg/mL) or streptomycin (10 µg/mL) where appropriate. Plates were incubated at 37°C for 24 ~ 48 h under microaerobic conditions established in sealed jars using the Anoxomat MarkII system (Mart Microbiology B.V., the Netherlands) after one atmosphere replacement with the following gas composition N<sub>2</sub>:H<sub>2</sub>:CO<sub>2</sub>, 85:5:10.

### Construction of *H. pylori* LPS mutants

**The deletion of *waaL* and HP0579 in strain G27.** G27Δ*waaL* and G27ΔHP0579 were generated using a highly efficient Xer-cise gene deletion method [48]. Following the four step methodology, mutants were made for *waaL* using primer set WaaL, and for HP0579 using primer set HP0579 (**Table C in S1 Text**). The resulting plasmids pWaaL-AB-difH-RC and p0579-AB-difH-RC were used to transform strain G27 to generate G27Δ*waaL* and G27ΔHP0579, respectively.

**The mutation of HP1284 in strains 26695 and G27.** The G27 HP1284 insertion mutant was generated using a MuA transposase methodology previously described [49]. Primers HP1284F and HP1284R were used to produce plasmid pCR2.1-1284-RC, which was used to transform strain G27 to generate G27HP1284::RC. The genomic DNA from G27HP1284::RC was used to transform strain 26695 to generate mutant 26695HP1284::RC. Simple unmarked deletion of the HP1284 deletion allele (ΔHP1284) in G27 was achieved using primer set HP1284 (**Table C in S1 Text**) as previously described [49]. The SOE-PCR product was used to transform G27HP1284::RC to generate HP1284 deletion mutant G27ΔHP1284.

**The complementation of G27ΔHP1284.** HPG27\_1236 (corresponds to HP1284) was amplified from G27 genomic DNA using primers HPG27\_1236F and HPG27\_1236R. The PCR product was digested with *XhoI* and cloned into the unique *XhoI* site of pHel2\_uP to give pHel2\_uP\_HP1284. The correct orientation of HP1284 was confirmed by the successful amplification of a 1.2 kb PCR product using primers HPG27\_1236F and pHel2F. The pHel2\_uP\_HP1284 plasmid was introduced into G27ΔHP1284 by conjugation in a tri-parental mating format as previously described [50] using *E. coli* β2150 transformed with pHel2\_uP\_HP1284 as the donor strain.

**The single and double deletion of HP1284 and *waaL* in strain X47.** The construct XHP1284::rpsL-cat that was made to replace HP1284 in X47 to obtain strain X47ΔHP1284. XHP1284::rpsL-cat construct was made using primer set XHP1284 and methodologies previously described [49]. Similarly the construct X*waaL*::kan was made to replace *waaL* gene in X47 to obtain X47Δ*waaL*. The X*waaL*::kan construct was made using primer set X*waaL*. pENT-RK was used as template DNA for the *alpha* cassette. The double deletion mutant X47ΔHP1284\_Δ*waaL* was obtained by natural transformation of strain X47ΔHP1284 with X*waaL*::kan.

**The deletion of HP0579-HP0580 in strain X47.** The construct XHP0579-80::rpsL-cat was made to replace the HP0579 and HP0580 open reading frames in X47 with the rpsL-cat cassette

to generate strain X47ΔHP0579-HP0580. The XHP0579-80::rpsL-cat construct was made using primer set XHP0579.

### LPS microextraction for silver stain and Western blot

LPS microextraction was prepared as previously described [51]. Briefly, bacterial cells (OD<sub>600</sub> = 3.0) harvested from CBA plates were suspended in 100 μL LPS lysis buffer (2% SDS, 4% β-mercaptoethanol, 0.1% bromophenol blue, 10% glycerol, 1 M Tris-HCl (pH 6.8)). Samples were heated at 100°C for 10 min. Thereafter, 5 μL proteinase K (PK) (20 mg/mL) was added to the cooled samples, and incubated in a 55°C water bath overnight. The obtained LPS samples were run on 15% SDS-PAGE gels or 16% Tricine-SDS-PAGE gels and visualized by silver stain [52] and by Western blot, using mouse anti-Le<sup>x</sup> (1:1500) and anti-Le<sup>y</sup> (1:1500) antibodies (Santa Cruz). After incubation with a secondary rabbit anti-mouse peroxidase-conjugated IgM antibody (1:10,000) (Jackson ImmunoResearch), detection of the HRP conjugates was accomplished by chemiluminescence (Sigma) using a LAS-3000 Intelligent DarkBox (Fujifilm) (software Image reader LAS 3000 V2.2).

### LPS large-scale extraction for structural analysis

LPS from wild-type G27 and X47, G27ΔHP1284 and X47ΔHP1284 was extracted using the hot phenol-water method [51] with modifications. The bacterial cells grown on 25 CBA plates (24 h growth) were harvested into 15 mL of 10 mM Tris-HCl buffer (pH 8.0) containing 2% SDS, 4% β-Mercaptoethanol and 2 mM MgCl<sub>2</sub>. After thorough suspension, 100 μL PK (20 mg/mL) was added to the cell mixture and incubated in a 55°C water bath overnight. Subsequently, 2 mL cold sodium acetate (3 M) and 20 mL cold absolute ethanol were added in order and the suspension was allowed to precipitate at -20°C overnight. LPS was then centrifuged down at 10,000 rpm for 10 min at 4°C, the supernatant discarded and the precipitation procedure repeated to remove residual SDS. After the final centrifugation, the pellet was suspended in 10 mL of 10 mM Tris-HCl buffer (pH 7.4). 100 μL DNase I (20 mg/mL) and 100 μL RNase (20 mg/mL) were added and the solution was incubated in a 37°C water bath for 4 h. The LPS mixture and 10 mL 90% liquid phenol were then transferred to a 68°C water bath for 10 min. The preheated phenol was then added to the LPS mixture, and incubated at 68°C for 30 min and then put on ice box for 10 min. The cooled mixture was centrifuged at 4,000 rpm for 60 min at 4°C and the resulting aqueous layer was carefully transferred to a 50 mL Falcon tube. The hot phenol-water extraction was repeated again and the two aqueous layers were combined. Phenol was removed by dialysis against water for 2 days. The LPS sample was then lyophilized and suspended in 10 mL water, and ultracentrifuged at 100,000 g for 12 h at 4°C. The resulted gel-like pellet was washed three times in 2 mL chloroform-methanol mixture (1:2 v/v) to remove phospholipids. After air drying, the LPS was resuspended in 3 mL H<sub>2</sub>O and lyophilized.

LPS from G27ΔwaaL was extracted using the EDTA-promoted method [53] with modifications. The bacterial cells grown on 25 CBA plates (24 h growth) were harvested into 15 mL of 10 mM Tris-HCl buffer (pH 8.0) containing 2mM MgCl<sub>2</sub>. The bacterial cells were sonicated, and DNase I and RNase A were added to a final concentration of 100 μg/mL and 25 μg/mL, respectively. The suspension was incubated in a 37°C water bath for 4 h. After the incubation, 5 mL of 0.5 M EDTA, 2.5 mL of 20% SDS, and 2.5 mL of 10 mM Tris-HCl buffer (pH 8.0) were added to give a final volume of 25 mL, and the pH was raised to 9.5. The solution was vortexed, and centrifuged at 50,000 g for 30 min at 20°C to remove peptidoglycan. The supernatant was transferred to a new 50 mL tube, and PK was added to give a final concentration of 200 μg/mL. The sample was then incubated in a 55°C water bath overnight. Two volumes of 0.375 M MgCl<sub>2</sub> in 95% ethanol were added, and the mixture was cooled in a -20°C freezer for

1 h. After the cooling step, the sample was centrifuged at 12,000 *g* for 15 min at 4°C. The obtained pellet was resuspended in 25 mL of 10 mM Tris-HCl (pH 8.0) containing 2% SDS and 0.1 M EDTA. The sample was then sonicated, and the pH was lowered to 7.0 by the addition of 4 M HCl. The solution was then incubated at 85°C for 30 min to ensure denaturation of SDS-resistant proteins. After cooling, the pH was raised to 9.5 by the addition of 4 M NaOH. PK was then added to give a final concentration of 25 µg/mL, and the sample incubated in a 55°C water bath for 4 h. After the incubation, two volumes of 0.375 M MgCl<sub>2</sub> in 95% ethanol were added, mixed, and cooled in -20°C freezer for 1 h. The sample was centrifuged at 12,000 *g* for 15 min at 4°C. The obtained LPS pellet was resuspended in 10 mL of 10 mM Tris-HCl (pH 8.0) containing 25 mM MgCl<sub>2</sub>, and subjected to sonication. The LPS solution was ultracentrifuged at 100,000 *g* for 12 h at 15°C. The obtained pellet was washed three times in 2 mL chloroform-methanol mixture (1:2, v/v) to remove phospholipids. After air drying, the LPS pellet was resuspended in 10 mL of 10 mM Tris-HCl (pH 8.0) containing 25 mM MgCl<sub>2</sub>, and ultracentrifugation was repeated as described above. The obtained LPS pellet was resuspended in H<sub>2</sub>O (3 mL) and lyophilized.

### GC-EI-MS trimethylsilyl analysis

Trimethylsilyl derivatised monosaccharides were prepared as previously described [54] and analysed on a PerkinElmer Clarus 500 instrument fitted with a RTX-5-fused silica capillary column. The oven temperature was initially 65°C, and increased to 140°C at the rate of 25°C/min, and then to 200°C at the rate of 5°C/min. The temperature was finally raised to 300°C at a rate of 10°C/min and held for 5 min.

### GC-EI-MS linkage analysis

Partially methylated alditol acetates were prepared as previously described [55]. A Bruker 456-GC/SCION SQ instrument fitted with a Bruker BR-5ms column was used to carry out the experiments. The sample was injected into the column at 60°C and held for 1 min, and the temperature was increased to 300°C over 30 min at a rate of 8°C/min and held for 5 min.

### Methanolysis and mild HF hydrolysis

LPS samples were dissolved in 0.5 M methanolic-HCl solution and incubated at 50°C for 40 min. The supernatant was collected and dried under a stream of nitrogen. The dried methanolysis products were permethylated and analysed by MS. For HF hydrolysis, LPS samples (200 µg) were hydrolysed as previously described [56] except that samples were dissolved in 50 µL of 48% HF and incubated at 4°C for 24 h with reagents being removed under a stream of nitrogen.

### Mild periodate oxidation

The LPS sample (200 µg) was dissolved in 100 µL sodium periodate solution (20 mM, in 100 mM ammonium acetate buffer, pH = 6.5). The solution was incubated at 4°C for 20 h in the dark. The reaction was terminated by adding ethylene glycol and was kept at room temperature for 1 h before lyophilisation. Sodium borohydride (400 µL, 10 mg/mL in 2 M ammonium hydroxide) was added to the sample and incubated at room temperature for 2 h. The reaction was quenched by adding 3–5 drops of acetic acid and purified by Dowex resin.

### Permethylation

Sodium hydroxide (three to five pellets per sample) was crushed in dimethyl sulfoxide (3 mL). The resulting slurry (0.75 mL) and iodomethane (0.85 mL) were added to the sample. After agitating at room temperature (60 min), the reaction was quenched by adding ultrapure water



(2 mL) with shaking. The glycans and lipo-glycans were extracted with chloroform (2 mL), and the solution was washed with ultrapure water (2x). The chloroform was then removed under a stream of nitrogen.

### Mass spectrometry

MALDI-TOF spectra were recorded by either a Voyager DE-STRM MALDI-TOF or a 4800 MALDI-TOF/TOF mass spectrometer (Applied Biosystems, Darmstadt, Germany) with MALDI-TOF/TOF spectra acquired with the latter instrument. The 4700 Calibration standard kit (Applied Biosystems) was used for calibrating the MS mode and fibrinopeptide B (Sigma) was used for calibrating the MS/MS mode. The collision energy for MS/MS was set to 1 kV, and the collision gas was argon. 2, 5-Dihydroxybenzoic acid and 3,4-diaminobenzophenone were used as matrix. Permethylated samples were dissolved in methanol (10  $\mu$ L) and the solution premixed with matrix (20 mg/mL) with a ratio of 1:1 (v/v) with the mixture (1  $\mu$ L) being spotted on the plate.

### Micelle NMR

The LPS samples were incorporated into micelles as previously described [57]. Briefly, 6.5 mg LPS sample was mixed with D<sub>38</sub>-DPC (Cambridge Isotope Laboratories, Inc.) at an estimated molar ratio of 1:40 dissolved in deuterated potassium phosphate (50 mM, pD = 6), and transferred to a 5 mm NMR tube. 1- and 2D TOCSY and NOESY NMR spectra were recorded at 30°C using a Bruker Avance III 600MHz NMR spectrometer equipped with a TXI/TCI cryoprobe.

### Determination of polymyxin B MIC

Minimum inhibitory concentrations were determined using polymyxin B Etest strips (Biomérieux). Bacteria from 24 h CBA plate cultures were collected in PBS and standardized to an OD<sub>600</sub> = 2.0. New blood agar plates were uniformly inoculated with standardized bacterial suspensions using a cotton swab and allowed to dry completely, followed by addition of the Etest strip to the centre of the plate. The plates were incubated at 37°C in a microaerobic atmosphere for 72 h before reading. Each experiment was repeated in triplicate, and the averages and standard deviations are reported.

### Mouse colonisation assays

C57BL/6J female mice aged 6–8 weeks were purchased from Animal Resource Centre, Australia. Each mouse was orally challenged with 0.2 mL bacterial inoculum in HI broth containing  $1 \times 10^9$  colony-forming units (CFU) of *H. pylori* strains harvested from CBA plates after 24 h growth at 37°C under microaerobic conditions. Three independent sets of experiments were performed. In Experiment 1, two groups of mice (n = 5 per group) challenged with wild-type X47 or X47 $\Delta$ HPI284 were sacrificed at 2 weeks. In Experiment 2, two groups of mice (n = 10 per group) challenged with wild-type X47 or X47 $\Delta$ HPI284 were also sacrificed at 2 weeks. In Experiment 3, four groups of mice (n = 5 per group) challenged with wild-type X47 or X47 $\Delta$ waal and were sacrificed at 2 and 8 weeks.

After sacrifice, the stomachs were removed from the mice and were opened along the greater curvature. The non-mucosal, squamous forestomach was discarded and the stomach content was gently removed with a sterile loop. Stomach tissue was cut into small pieces and homogenized in 1 mL HI broth by a Tissue lyser (Qiagen). Aliquots (100  $\mu$ L) of neat,  $1 \times 10^{-1}$  and  $1 \times 10^{-2}$  dilutions of the stomach homogenate were spread onto *H. pylori* selective plates

(CBA containing 5% horse blood, Dent supplement (Oxoid), nalidixic acid at 10 µg/mL and bacitracin at 100 µg/mL. After culture for 4–5 days, the number of colonies was counted and CFU/stomach was calculated to determine bacterial load.

## Ethics statement

Mouse experimental procedures were reviewed and approved by the Institutional Animal Care and the Animal Ethics Committee of the University of Western Australia (AEC Approval No: RA 03/100/1085) and adhered to the Australian code for the care and use of animals for scientific purposes (8<sup>th</sup> Edition, 2013) and the Animal Welfare Act (2002) of Western Australia. Animals were euthanased using Isoflurane inhalation and cervical dislocation.

## Supporting information

**S1 Text.**  
(DOCX)

## Author Contributions

**Conceptualization:** MB.

**Formal analysis:** TY SMH BM AD.

**Funding acquisition:** HL AWD SMH AD KAS.

**Investigation:** HL TY TL AWD HON AF SMH BM AD.

**Methodology:** HL TY.

**Project administration:** AD MB.

**Resources:** AD AF BJM MB.

**Supervision:** AD MB.

**Validation:** AD MB.

**Visualization:** HL TY TL AWD.

**Writing – original draft:** HL TY TL AWD SMH BM AD KAS MB.

**Writing – review & editing:** KAS BJM MB.

## References

1. Marshall BJ, Armstrong JA, McGeachie DB, Glancy RJ (1985) Attempt to fulfil Koch's postulates for pyloric *Campylobacter*. *Med J Aust* 142: 436–439. PMID: [3982345](https://pubmed.ncbi.nlm.nih.gov/3982345/)
2. Blaser MJ, Atherton JC (2004) *Helicobacter pylori* persistence: biology and disease. *J Clin Invest* 113: 321–333. <https://doi.org/10.1172/JCI20925> PMID: [14755326](https://pubmed.ncbi.nlm.nih.gov/14755326/)
3. Appelmelk BJ, Simoons-Smit I, Negrini R, Moran AP, Aspinall GO, et al. (1996) Potential role of molecular mimicry between *Helicobacter pylori* lipopolysaccharide and host Lewis blood group antigens in autoimmunity. *Infect Immun* 64: 2031–2040. PMID: [8675304](https://pubmed.ncbi.nlm.nih.gov/8675304/)
4. Aspinall GO, Monteiro MA, Pang H, Walsh EJ, Moran AP (1996) Lipopolysaccharide of the *Helicobacter pylori* type strain NCTC 11637 (ATCC 43504): Structure of the O antigen chain and core oligosaccharide regions. *Biochemistry* 35: 2489–2497. <https://doi.org/10.1021/bi951852s> PMID: [8652593](https://pubmed.ncbi.nlm.nih.gov/8652593/)
5. Monteiro MA (2001) *Helicobacter pylori*: a wolf in sheep's clothing: the glyco-type families of *Helicobacter pylori* lipopolysaccharides expressing histo-blood groups: structure, biosynthesis, and role in pathogenesis. *Adv Carbohydr Chem Biochem* 57: 99–158. PMID: [11836945](https://pubmed.ncbi.nlm.nih.gov/11836945/)

6. Monteiro MA, Appelmek BJ, Rasko DA, Moran AP, Hynes SO, et al. (2000) Lipopolysaccharide structures of *Helicobacter pylori* genomic strains 26695 and J99, mouse model *H. pylori* Sydney strain, *H. pylori* P466 carrying sialyl Lewis X, and *H. pylori* UA915 expressing Lewis B classification of *H. pylori* lipopolysaccharides into glyco-type families. *Eur J Biochem* 267: 305–320. PMID: [10632700](#)
7. Moran AP, Knirel YA, Senchenkova SN, Widmalm G, Hynes SO, et al. (2002) Phenotypic variation in molecular mimicry between *Helicobacter pylori* lipopolysaccharides and human gastric epithelial cell surface glycoforms. Acid-induced phase variation in Lewis(x) and Lewis(y) expression by *H. pylori* lipopolysaccharides. *J Biol Chem* 277: 5785–5795. <https://doi.org/10.1074/jbc.M108574200> PMID: [11741906](#)
8. Raetz CR, Whitfield C (2002) Lipopolysaccharide endotoxins. *Annu Rev Biochem* 71: 635–700. <https://doi.org/10.1146/annurev.biochem.71.110601.135414> PMID: [12045108](#)
9. Cullen TW, Giles DK, Wolf LN, Ecobichon C, Boneca IG, et al. (2011) *Helicobacter pylori* versus the host: remodeling of the bacterial outer membrane is required for survival in the gastric mucosa. *PLoS Pathog* 7: e1002454. <https://doi.org/10.1371/journal.ppat.1002454> PMID: [22216004](#)
10. Kobayashi K, Sakamoto J, Kito T, Yamamura Y, Koshikawa T, et al. (1993) Lewis blood group-related antigen expression in normal gastric epithelium, intestinal metaplasia, gastric adenoma, and gastric carcinoma. *Am J Gastroenterol* 88: 919–924. PMID: [8503388](#)
11. Nogueira AM, Marques T, Soares PCM, David L, Reis CA, et al. (2004) Lewis antigen expression in gastric mucosa of children: Relationship with *Helicobacter pylori* infection. *J Pediatr Gastroenterol Nutr* 38: 85–91. PMID: [14676601](#)
12. Algood HM, Cover TL (2006) *Helicobacter pylori* persistence: an overview of interactions between *H. pylori* and host immune defenses. *Clin Microbiol Rev* 19: 597–613. <https://doi.org/10.1128/CMR.00006-06> PMID: [17041136](#)
13. Li H, Liao T, Debowski AW, Tang H, Nilsson HO, et al. (2016) Lipopolysaccharide structure and biosynthesis in *Helicobacter pylori*. *Helicobacter* 21: 445–461. <https://doi.org/10.1111/hel.12301> PMID: [26934862](#)
14. Tomb JF, White O, Kerlavage AR, Clayton RA, Sutton GG, et al. (1997) The complete genome sequence of the gastric pathogen *Helicobacter pylori*. *Nature* 388: 539–547. <https://doi.org/10.1038/41483> PMID: [9252185](#)
15. Altman E, Chandan V, Li J, Vinogradov E (2011) Lipopolysaccharide structures of *Helicobacter pylori* wild-type strain 26695 and 26695 HP0826::Kan mutant devoid of the O-chain polysaccharide component. *Carbohydr Res* 346: 2437–2444. <https://doi.org/10.1016/j.carres.2011.06.036> PMID: [21903201](#)
16. Logan SM, Conlan JW, Monteiro MA, Wakarchuk WW, Altman E (2000) Functional genomics of *Helicobacter pylori*: identification of a beta-1,4 galactosyltransferase and generation of mutants with altered lipopolysaccharide. *Mol Microbiol* 35: 1156–1167. PMID: [10712696](#)
17. Moran AP, Shiberu B, Ferris JA, Knirel YA, Senchenkova SN, et al. (2004) Role of *Helicobacter pylori* *rfaJ* genes (*HP0159* and *HP1416*) in lipopolysaccharide synthesis. *FEMS Microbiol Lett* 241: 57–65. <https://doi.org/10.1016/j.femsle.2004.10.004> PMID: [15556710](#)
18. Stead CM, Zhao J, Raetz CR, Trent MS (2010) Removal of the outer Kdo from *Helicobacter pylori* lipopolysaccharide and its impact on the bacterial surface. *Mol Microbiol* 78: 837–852. <https://doi.org/10.1111/j.1365-2958.2010.07304.x> PMID: [20659292](#)
19. Altman E, Chandan V, Larocque S, Aubry A, Logan SM, et al. (2008) Effect of the HP0159 ORF mutation on the lipopolysaccharide structure and colonizing ability of *Helicobacter pylori*. *FEMS Immunol Med Microbiol* 53: 204–213. <https://doi.org/10.1111/j.1574-695X.2008.00416.x> PMID: [18430002](#)
20. Chandan V, Logan SM, Harrison BA, Vinogradov E, Aubry A, et al. (2007) Characterization of a *waaF* mutant of *Helicobacter pylori* strain 26695 provides evidence that an extended lipopolysaccharide structure has a limited role in the invasion of gastric cancer cells. *Biochem Cell Biol* 85: 582–590. <https://doi.org/10.1139/o07-056> PMID: [17901900](#)
21. Logan SM, Altman E, Mykytczuk O, Brisson JR, Chandan V, et al. (2005) Novel biosynthetic functions of lipopolysaccharide *rfaJ* homologs from *Helicobacter pylori*. *Glycobiology* 15: 721–733. <https://doi.org/10.1093/glycob/cwi057> PMID: [15814825](#)
22. Hiratsuka K, Logan SM, Conlan JW, Chandan V, Aubry A, et al. (2005) Identification of a D-glycero-D-manno-heptosyltransferase gene from *Helicobacter pylori*. *J Bacteriol* 187: 5156–5165. <https://doi.org/10.1128/JB.187.15.5156-5165.2005> PMID: [16030209](#)
23. Stead C, Tran A, Ferguson D Jr., McGrath S, Cotter R, et al. (2005) A novel 3-deoxy-D-manno-octulosonic acid (Kdo) hydrolase that removes the outer Kdo sugar of *Helicobacter pylori* lipopolysaccharide. *J Bacteriol* 187: 3374–3383. <https://doi.org/10.1128/JB.187.10.3374-3383.2005> PMID: [15866922](#)
24. Stead CM, Beasley A, Cotter RJ, Trent MS (2008) Deciphering the unusual acylation pattern of *Helicobacter pylori* lipid A. *J Bacteriol* 190: 7012–7021. <https://doi.org/10.1128/JB.00667-08> PMID: [18757539](#)

25. Tran AX, Karbarz MJ, Wang X, Raetz CR, McGrath SC, et al. (2004) Periplasmic cleavage and modification of the 1-phosphate group of *Helicobacter pylori* lipid A. *J Biol Chem* 279: 55780–55791. <https://doi.org/10.1074/jbc.M406480200> PMID: 15489235
26. Tran AX, Stead CM, Trent MS (2005) Remodeling of *Helicobacter pylori* lipopolysaccharide. *J Endotoxin Res* 11: 161–166. <https://doi.org/10.1179/096805105X37349> PMID: 15949144
27. Tran AX, Whittimore JD, Wyrick PB, McGrath SC, Cotter RJ, et al. (2006) The lipid A 1-phosphatase of *Helicobacter pylori* is required for resistance to the antimicrobial peptide polymyxin. *J Bacteriol* 188: 4531–4541. <https://doi.org/10.1128/JB.00146-06> PMID: 16740959
28. Whitfield C, Trent MS (2014) Biosynthesis and export of bacterial lipopolysaccharides. *Annu Rev Biochem* 83: 99–128. <https://doi.org/10.1146/annurev-biochem-060713-035600> PMID: 24580642
29. Moran AP (1996) The role of lipopolysaccharide in *Helicobacter pylori* pathogenesis. *Aliment Pharmacol Ther* 10 Suppl 1: 39–50.
30. Moran AP, Lindner B, Walsh EJ (1997) Structural characterization of the lipid A component of *Helicobacter pylori* rough- and smooth-form lipopolysaccharides. *J Bacteriol* 179: 6453–6463. PMID: 9335296
31. Moran AP (2008) Relevance of fucosylation and Lewis antigen expression in the bacterial gastroduodenal pathogen *Helicobacter pylori*. *Carbohydr Res* 343: 1952–1965. <https://doi.org/10.1016/j.carres.2007.12.012> PMID: 18279843
32. Altman E, Chandan V, Li J, Vinogradov E (2011) A reinvestigation of the lipopolysaccharide structure of *Helicobacter pylori* strain Sydney (SS1). *FEBS J* 278: 3484–3493. <https://doi.org/10.1111/j.1742-4658.2011.08270.x> PMID: 21790998
33. Altman E, Smirnova N, Li JJ, Aubry A, Logan SM (2003) Occurrence of a nontypable *Helicobacter pylori* strain lacking Lewis blood group O antigens and DD-heptoglycan: evidence for the role of the core alpha 1,6-glucan chain in colonization. *Glycobiology* 13: 777–783. <https://doi.org/10.1093/glycob/cwg106> PMID: 12907691
34. Altman E CV, Li J, Vinogradov E. (2013) Lipopolysaccharide structure of *Helicobacter pylori* serogroup O:3. *Carbohydr Res* 378: 139–143. <https://doi.org/10.1016/j.carres.2013.03.008> PMID: 23541029
35. Chandan V, Jeremy AHT, Dixon MF, Altman E, Crabtree JE (2013) Colonization of gerbils with *Helicobacter pylori* O-chain-deficient mutant SS1 HP0826::Kan results in gastritis and is associated with de novo synthesis of extended homopolymers. *Pathog Dis* 67: 91–99. <https://doi.org/10.1111/2049-632X.12021> PMID: 23620153
36. Hug I, Couturier MR, Rooker MM, Taylor DE, Stein M, et al. (2010) *Helicobacter pylori* lipopolysaccharide is synthesized via a novel pathway with an evolutionary connection to protein N-glycosylation. *PLoS Pathog* 6: e1000819. <https://doi.org/10.1371/journal.ppat.1000819> PMID: 20333251
37. Hug I, Feldman MF (2010) Analogies and homologies in lipopolysaccharide and glycoprotein biosynthesis in bacteria. *Glycobiology* 21: 138–151. <https://doi.org/10.1093/glycob/cwq148> PMID: 20871101
38. Baltus DA, Amieva MR, Covacci A, Lowe TM, Merrell DS, et al. (2009) The complete genome sequence of *Helicobacter pylori* strain G27. *J Bacteriol* 191: 447–448. <https://doi.org/10.1128/JB.01416-08> PMID: 18952803
39. Poppe L, van Halbeek H, Acquotti D, Sonnino S (1994) Carbohydrate dynamics at a micellar surface: GD1a headgroup transformations revealed by NMR spectroscopy. *Biophys J* 66: 1642–1652. [https://doi.org/10.1016/S0006-3495\(94\)80956-7](https://doi.org/10.1016/S0006-3495(94)80956-7) PMID: 8061213
40. Zahringer U, Ittig S, Lindner B, Moll H, Schombel U, et al. (2014) NMR-based structural analysis of the complete rough-type lipopolysaccharide isolated from *Capnocytophaga canimorsus*. *J Biol Chem* 289: 23963–23976. <https://doi.org/10.1074/jbc.M114.571489> PMID: 24993825
41. Kleanthous H, Tibbitts TJ, Gray HL, Myers GA, Lee CK, et al. (2001) Sterilizing immunity against experimental *Helicobacter pylori* infection is challenge-strain dependent. *Vaccine* 19: 4883–4895. PMID: 11535342
42. Heinrichs DE, Monteiro MA, Perry MB, Whitfield C (1998) The assembly system for the lipopolysaccharide R2 core-type of *Escherichia coli* is a hybrid of those found in *Escherichia coli* K-12 and *Salmonella enterica*. Structure and function of the R2 WaaK and WaaL homologs. *J Biol Chem* 273: 8849–8859. PMID: 9535865
43. Kaniuk NA, Vinogradov E, Whitfield C (2004) Investigation of the structural requirements in the lipopolysaccharide core acceptor for ligation of O antigens in the genus *Salmonella*: WaaL "ligase" is not the sole determinant of acceptor specificity. *J Biol Chem* 279: 36470–36480. <https://doi.org/10.1074/jbc.M401366200> PMID: 15215252
44. Abeyrathne PD, Lam JS (2007) WaaL of *Pseudomonas aeruginosa* utilizes ATP in in vitro ligation of O antigen onto lipid A-core. *Mol Microbiol* 65: 1345–1359. <https://doi.org/10.1111/j.1365-2958.2007.05875.x> PMID: 17697256

45. McGee DJ, George AE, Trainor EA, Horton KE, Hildebrandt E, et al. (2011) Cholesterol enhances *Helicobacter pylori* resistance to antibiotics and LL-37. *Antimicrob Agents Chemother* 55: 2897–2904. <https://doi.org/10.1128/AAC.00016-11> PMID: 21464244
46. Dalebroux ZD, Matamouros S, Whittington D, Bishop RE, Miller SI (2014) PhoPQ regulates acidic glycerophospholipid content of the *Salmonella typhimurium* outer membrane. *Proc Natl Acad Sci U S A* 111: 1963–1968. <https://doi.org/10.1073/pnas.1316901111> PMID: 24449881
47. Harrison BA, Fernandez H, Chandan V, Schuster MW, Rademacher LO, et al. (2011) Characterization and functional activity of murine monoclonal antibodies specific for alpha1,6-glucan chain of *Helicobacter pylori* lipopolysaccharide. *Helicobacter* 16: 459–467. <https://doi.org/10.1111/j.1523-5378.2011.00860.x> PMID: 22059397
48. Debowski AW, Gauntlett JC, Li H, Liao T, Sehnal M, et al. (2012) Xer-cise in *Helicobacter pylori*: one-step transformation for the construction of markerless gene deletions. *Helicobacter* 17: 435–443. <https://doi.org/10.1111/j.1523-5378.2012.00969.x> PMID: 23066820
49. Debowski AW, Carnoy C, Verbrugghe P, Nilsson HO, Gauntlett JC, et al. (2012) Xer recombinase and genome integrity in *Helicobacter pylori*, a pathogen without topoisomerase IV. *PLoS One* 7: e33310. <https://doi.org/10.1371/journal.pone.0033310> PMID: 22511919
50. Heuermann D, Haas R (1998) A stable shuttle vector system for efficient genetic complementation of *Helicobacter pylori* strains by transformation and conjugation. *Mol Gen Genet* 257: 519–528. PMID: 9563837
51. Apicella MA (2008) Isolation and characterization of lipopolysaccharides. *Methods Mol Biol* 431: 3–13. PMID: 18287743
52. Tsai CM, Frasch CE (1982) A sensitive silver stain for detecting lipopolysaccharides in polyacrylamide gels. *Anal Biochem* 119: 115–119. PMID: 6176137
53. Darveau RP, Hancock RE (1983) Procedure for isolation of bacterial lipopolysaccharides from both smooth and rough *Pseudomonas aeruginosa* and *Salmonella typhimurium* strains. *J Bacteriol* 155: 831–838. PMID: 6409884
54. Zhang H, Zhu F, Yang T, Ding L, Zhou M, et al. (2014) The highly conserved domain of unknown function 1792 has a distinct glycosyltransferase fold. *Nat Commun* 5: 4339. <https://doi.org/10.1038/ncomms5339> PMID: 25023666
55. Jang-Lee J, North SJ, Sutton-Smith M, Goldberg D, Panico M, et al. (2006) Glycomic profiling of cells and tissues by mass spectrometry: fingerprinting and sequencing methodologies. *Methods Enzymol* 415: 59–86. [https://doi.org/10.1016/S0076-6879\(06\)15005-3](https://doi.org/10.1016/S0076-6879(06)15005-3) PMID: 17116468
56. Haslam SM, Khoo KH, Houston KM, Harnett W, Morris HR, et al. (1997) Characterisation of the phosphorylcholine-containing N-linked oligosaccharides in the excretory-secretory 62 kDa glycoprotein of *Acanthocheilonema viteae*. *Mol Biochem Parasitol* 85: 53–66. PMID: 9108548
57. Acquotti D, Sonnino S (2000) Use of nuclear magnetic resonance spectroscopy in evaluation of ganglioside structure, conformation, and dynamics. *Methods Enzymol* 312: 247–272. PMID: 11070877
